# Supplementary material for: Efficacy and safety of sacubitril/valsartan in patients with heart failure with reduced ejection fraction and hypotension
Source: Research Square preprint supplement (doi:10.21203/rs.3.rs-2591328/v1), 2023-02-22
Supplement: Supplementary file 1 [file 1e4e8d75bb0c9cedbb43e13c.docx]

**supplementary material**

**Figure S1**

**Figure S1 legend**

Titration proportions of 1/2 targeted and targeted ARNI and beta-blockers across the two SBP categories.

**Table S1** Treatment effects of sacubitril/valsartan on echocardiographic parameters across two SBP categories from baseline to month 6.

|  | **SBP <100 mmHg (N=47)** | |  | **SBP ≥100mmHg (N=70)** | | *P* value |
| --- | --- | --- | --- | --- | --- | --- |
| Parameter | baseline | 6month |  | baseline | 6month |
| LVEDD(x±s, mm) | 63.6 ± 11.0 | 59.7 ± 10.0 |  | 64.9 ± 8.4 | 58.6 ± 8.2 | **0.03**✝ |
| ΔLVEDD |  | -3.3 |  |  | -6.5 |
| **P* value |  | **0.004** |  |  | **0.000** |
| LVEF(x±s, %) | 29.1 ± 10.0 | 40.1 ± 11.0 |  | 27.8 ± 7.7 | 42.2 ± 11.5 | 0.12✝ |
| ΔLVEF(x±s, %) |  | +10.8 |  |  | +14.0 |
| **P* value |  | **0.000** |  |  | **0.000** |
| LAD(x±s, mm) | 42.8 ± 8.4 | 40.3 ± 9.0 |  | 46.1 ± 8.9 | 42.4 ± 7.4 | 0.63✝ |
| ΔLAD(x±s, mm) |  | -3.1 |  |  | -3.5 |
| **P* value |  | **0.008** |  |  | **0.000** |

*Paired T-test

✝Two-sample T-test

**Table S2** Treatment effects of sacubitril/valsartan on selected vital signs and laboratory values across two SBP categories from baseline to month 6.

|  | **SBP <100 mmHg (N=47)** | |  | **SBP ≥100mmHg (N=70)** | | *P* value |
| --- | --- | --- | --- | --- | --- | --- |
| Parameter | baseline | 6month |  | baseline | 6month |
| NT-proBNP (pg/mL) | 1452.0(600.6, 3172.0) | 549.8 (185.0, 1235.5) |  | 1690.0 (384.1,3582.5) | 371.1 (101.7, 753.8) | 0.75☨ |
| Change from baseline |  | -1069.1 |  |  | -1340.1 |
| #*P* value |  | **0.000** |  |  | **0.000** |
| eGFR (ml/min/1.73m²) | 90.7 ± 21.5 | 92.7 ± 25.3 |  | 84.1 ± 26.9 | 96.6 ± 27.4 | 0.69✝ |
| Change from baseline |  | +7.5 |  |  | +7.6 |
| **P* value |  | 0.059 |  |  | **0.015** |
| Serium potassium(mmol/L) | 4.3 ± 0.3 | 4.4 ± 0.3 |  | 4.3 ± 0.4 | 4.3 ± 0.3 | **0.04**✝ |
| Change from baseline |  | +0.1 |  |  | -0.1 |
| **P* value |  | 0.095 |  |  | 0.203 |
| SBP(mmHg) | 90.6 ± 5.1 | 98.3 ± 13.2 |  | 121.6 ± 15.9 | 110.4 ± 14.3 | **0.00**✝ |
| Change from baseline |  | +7.5 |  |  | -11.5 |
| **P* value |  | **0.001** |  |  | **0.000** |
| DBP(mmHg) | 60.0 (55.0, 65.0) | 60.0 (53.0, 65.0) |  | 74.0 (66.0, 82.3) | 69.0 (63.0, 75.0) | **0.02**☨ |
| Change from baseline |  | -2.0 |  |  | -7.0 |
| *#P* value |  | 0.134 |  |  | **0.000** |
| Heart rate (b.p.m.) | 71.0 (64.0, 83.0) | 63.0 (60.0, 72.0) |  | 80.0 (71.8, 90.5) | 60.0 (57.5, 66.0) | 0.15☨ |
| Change from baseline |  | -10.5 |  |  | -16.5 |
| *#P* value |  | **0.025** |  |  | **0.000** |

*Paired T-test

#Wilcoxon signed rank test ✝Two-sample T-test

☨Wilcoxon rank sum test

**Table S3** The change of NYHA functional classification across the two SBP categories.

|  | NYHA classification | I | II | III | IV |
| --- | --- | --- | --- | --- | --- |
| SBP <100 mmHg | baseline (n=47) | 0.0% | 53.2% | 36.2% | 10.6% |
|  | 6 month (n=42) | 16.7% | 76.2% | 7.1% | 0.0% |
| SBP ≥100mmHg | baseline (n=70) | 0.0% | 42.9% | 40.0% | 17.1% |
|  | 6 month (n=70) | 21.4% | 71.4% | 7.1% | 0.0% |

**Table S4**  Dose changes of sacubitril/valsartan across the two SBP categories.

|  | Dose (mg bid) | ＜50 | 50-100 | 100-200 | 200 |
| --- | --- | --- | --- | --- | --- |
| SBP <100 mmHg | Baseline (n=47) | 44.7% | 48.9% | 6.4% | 0.0% |
|  | 6 month (n=42) | 4.8% | 19.0% | 23.8% | 52.4% |
| SBP ≥100mmHg | baseline（n=70) | 30.0% | 47.1% | 21.4% | 1.4% |
|  | 6 month (n=70) | 1.4% | 8.6% | 20.0% | 70.0% |

**Table S5** Dose changes of beta-blockers across the two SBP categories.

|  | Dose | ＜25 % TD | 25-50 % TD | 50-100 % TD | 100 % TD |
| --- | --- | --- | --- | --- | --- |
| SBP <100 mmHg | baseline (n=47) | 29.8% | 51.1% | 17.0% | 2.1% |
|  | 6 month (n=42) | 2.4% | 19.0% | 28.6% | 50.0% |
| SBP ≥100mmHg | baseline (n=70) | 21.4% | 42.9% | 25.7% | 10.0% |
|  | 6 month (n=70) | 7.1% | 15.7% | 21.4% | 55.7% |

TD, targeted dose

**Table S6** The proportion of 1/2 targeted and targeted ARNI and beta-blocker across the two SBP categories during the titration.

|  | SBP ＜100mmHg (N=42) | SBP ≥100 mmHg (N=70) | *P*-value |
| --- | --- | --- | --- |
| TD of ARNI (%) | 22（52.4%） | 49（70.0%） | 0.061 |
| 1/2 TD of ARNI (%) | 32（76.2%） | 63（90.0%） | **0.049** |
| Median targeted time of ARNI (month) | 6 | 3 | 0.209 |
| TD of β-blocker (%) | 21（50.0%） | 39（55.7%） | 0.557 |
| 1/2 TD of β-blocker (%) | 33（78.6%） | 54（77.1%） | 0.860 |
